# Supplementary material for: miR-124 dosage regulates prefrontal cortex function by dopaminergic modulation
Source: PubMed Central journal article supplement (PMC6401137; doi:10.1038/s41598-019-38910-2), 2019-03-05
Supplement: 41598_2019_38910_MOESM1_ESM.pdf [file 41598_2019_38910_MOESM1_ESM.pdf]

## ***miR-124* dosage regulates prefrontal cortex function by dopaminergic modulation**

Takashi Kozuka<sup>1,2,#</sup>, Yoshihiro Omori<sup>1,2,#</sup>, Satoshi Watanabe<sup>1,2</sup>, Etsuko Tarusawa<sup>3</sup>, Haruka Yamamoto<sup>1</sup>, Taro Chaya<sup>1,2</sup>, Mayu Furuhashi<sup>1</sup>, Makiko Morita<sup>4</sup>, Tetsuya Sato<sup>5</sup>, Shinichi Hirose<sup>7</sup>, Yasuyuki Ohkawa<sup>6</sup>, Yumiko Yoshimura<sup>3</sup>, Takatoshi Hikida<sup>4,8</sup>, Takahisa Furukawa<sup>1,2,\*</sup>

<sup>1</sup>Laboratory for Molecular and Developmental Biology, Institute for Protein Research, Osaka University, 3-2 Yamadaoka, Suita, Osaka, 565-0871, Japan.

<sup>2</sup>JST, CREST, 3-2 Yamadaoka, Suita, Osaka, 565-0871, Japan.

<sup>3</sup>Division of Visual Information Processing, National Institute for Physiological Sciences, National Institutes of Natural Sciences, 38 Nishigonaka Myodaiji, Okazaki 444-8585, Japan.

<sup>4</sup>Medical Innovation Center, Kyoto University Graduate School of Medicine, 53 Shogoin-Kawahara-cho, Sakyo-ku, Kyoto 606-8507, Japan

<sup>5</sup>Division of Bioinformatics, Medical Institute of Bioregulation, Kyushu University, 3-1-1 Maidashi, Higashi-ku, Fukuoka 812-8582, Japan.

<sup>6</sup>Division of Transcriptomics, Medical Institute of Bioregulation, Kyushu University, 3-1-1 Maidashi, Higashi-ku, Fukuoka 812-8582, Japan.

<sup>7</sup>Department of Pediatrics, School of Medicine, Fukuoka University, 45-1-7 Nanakuma, Jonan-ku, Fukuoka, 814-0180, Japan.

<sup>8</sup>Laboratory for Advanced Brain Functions, Institute for Protein Research, Osaka University, 3-2 Yamadaoka, Suita, Osaka, 565-0871, Japan.

<sup>#</sup>These authors contributed equally to this work.

<sup>\*</sup>Corresponding author: Takahisa Furukawa

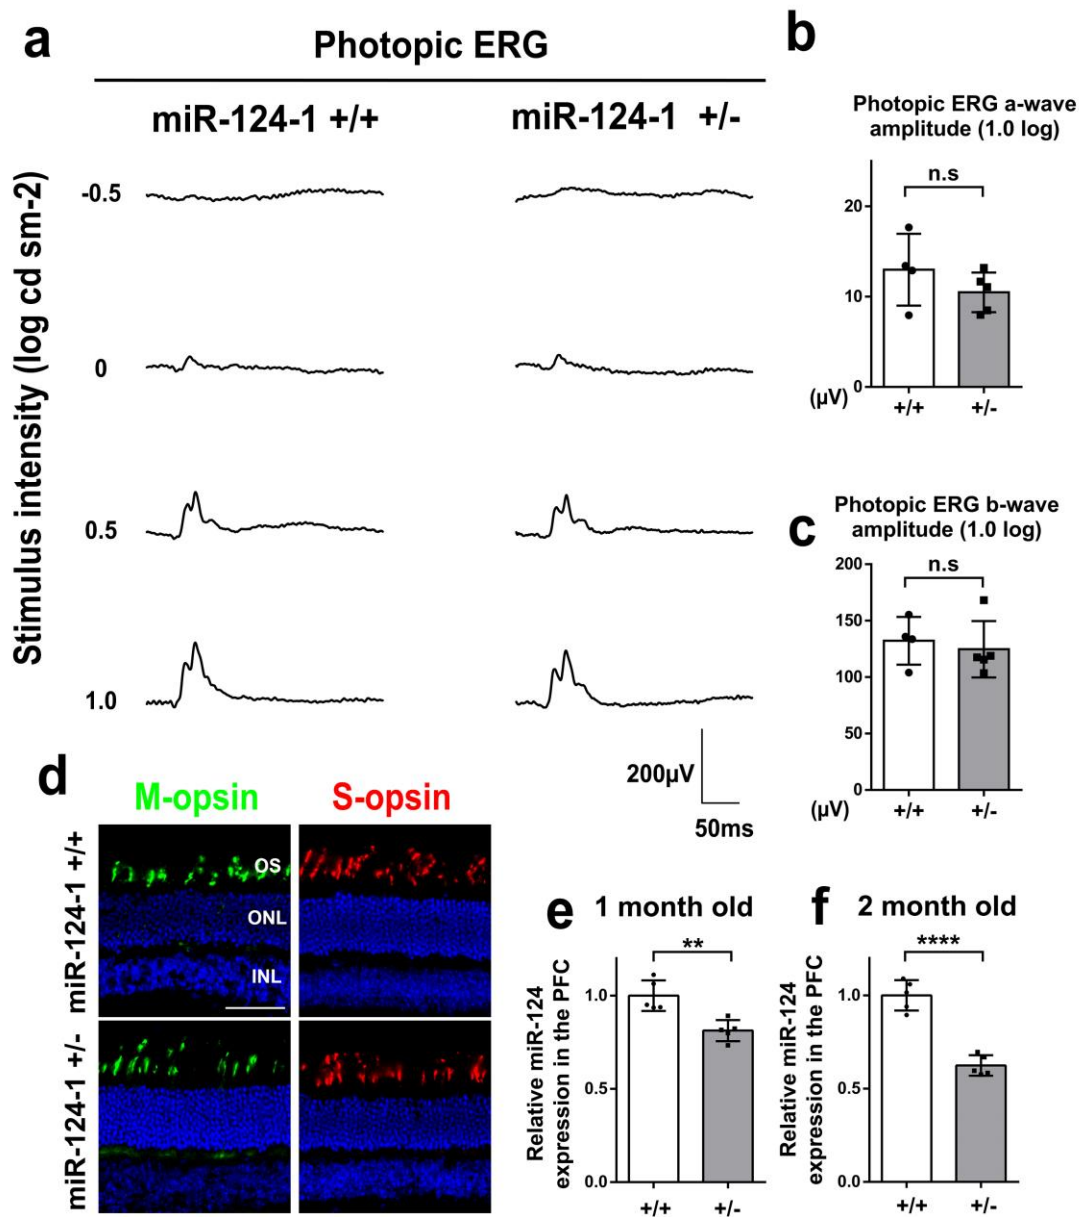

**Figure S1.** Electrophysiological, histological and molecular analyses of WT and *miR-124-1*<sup>+/-</sup> mice.

**a**, Representative light-adapted (photopic) ERGs in WT control and *miR-124-1*<sup>+/-</sup> mice at 2M elicited by four different stimulus intensities (-0.5, 0, 0.5, and 1.0 log cd sm<sup>-2</sup>).

**b, c**, Both a-wave and b-wave amplitudes in *miR-124-1*<sup>+/-</sup> mice were not significantly altered compared with those in WT mice (WT, n = 4; Het, n = 5; n.s., not significant).

**d**, The retinal sections of WT and *miR-124-1*<sup>+/-</sup> mice at 2M were immunostained with the anti-M-opsin (a green-cone outer segment marker, green), and the anti-S-opsin (a blue-cone outer segment marker, red) antibodies. The distribution of the M-opsin and the S-opsin signals was normal in the *miR-124-1*<sup>+/-</sup> retina. Scale bars, 50 μm. OS, outer segment; ONL, outer nuclear layer; INL, inner nuclear layer.

**e, f**, The expression level of *miR-124* in the PFC was analyzed using qRT-PCR at 1M (**e**) or 2M (**f**). *miR-124* expression significantly decreased in the *miR-124-1*<sup>+/-</sup> PFC at 1M and 2M (WT, n = 5; Het, n = 5; \*\*  $p < 0.01$ , \*\*\*\*  $p < 0.0001$ ). Error bars represent mean ± SD.

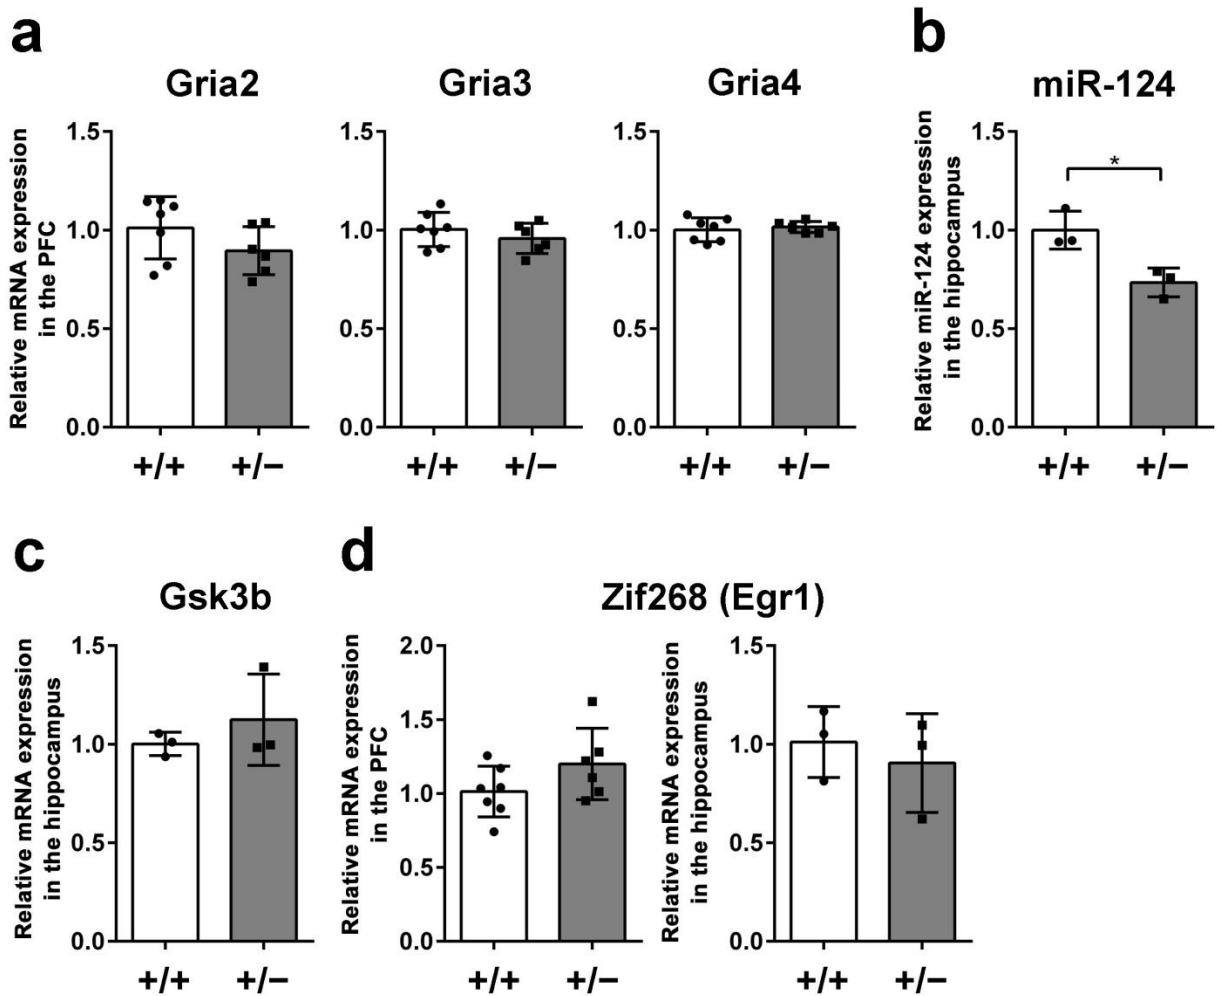

**Figure S2.** Expression levels of previously reported *miR-124* target genes in the *miR-124-1<sup>+/-</sup>* PFC and hippocampus.

**a**, *Gria2*, *3* and *4* expressions were not significantly altered between 2M *miR-124-1<sup>+/-</sup>* and WT PFCs (WT, n = 7; Het, n = 6).

**b**, Quantification of *miR-124* expression level in the hippocampus. *miR-124* expression significantly decreased in the 2M *miR-124-1<sup>+/-</sup>* hippocampus (WT, n = 3; Het, n = 3; \**p* < 0.05).

**c**, *Gsk3b* expression was not significantly affected between the 2M *miR-124-1<sup>+/-</sup>* and WT hippocampus (WT, n = 3; Het, n = 3).

**d**, *Zif268 (Egr1)* expression in the PFC (WT, n = 7; Het, n = 6) and hippocampus (WT, n = 3; Het, n = 3) was not significantly altered between the 2M *miR-124-1<sup>+/-</sup>* and WT mice. Error bars represent  $\pm$  SD.
